# Supplementary material for: Impact of aerosols on ice crystal size
Source: PubMed Central journal article supplement — Atmos Chem Phys. Author manuscript; Available in PMC 2019 Sep 18. (PMC6750036; doi:10.5194/acp-18-1065-2018), 2018
Supplement: NIHMS1024745-supplement-SI.pdf [file NIHMS1024745-supplement-SI.pdf]

Supplement of Atmos. Chem. Phys., 18, 1065–1078, 2018  
<https://doi.org/10.5194/acp-18-1065-2018-supplement>  
© Author(s) 2018. This work is distributed under  
the Creative Commons Attribution 4.0 License.

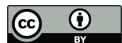

*Supplement of*

## **Impact of aerosols on ice crystal size**

**B. Zhao et al.**

*Correspondence to:* Bin Zhao ([zhaob1206@ucla.edu](mailto:zhaob1206@ucla.edu)) and Yu Gu ([gu@atmos.ucla.edu](mailto:gu@atmos.ucla.edu))

The copyright of individual parts of the supplement might differ from the CC BY 4.0 License.

1 **Figures and Tables**

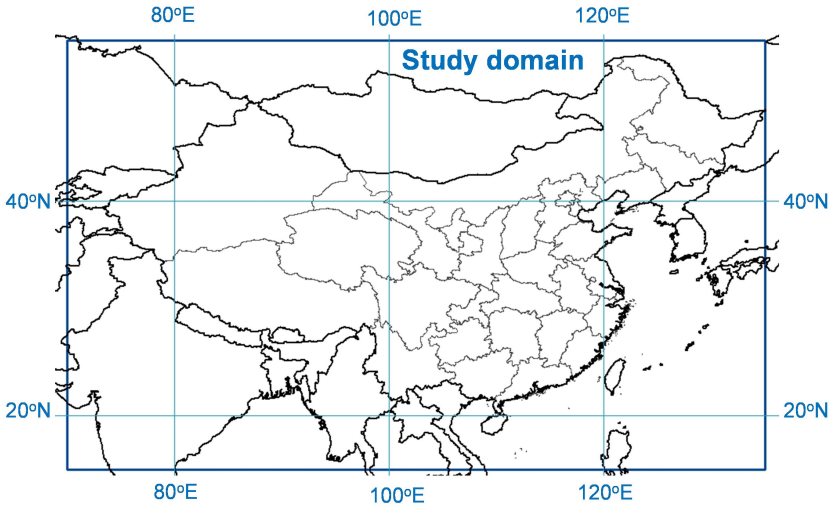

2  
3 Figure S1. The spatial domain of this study: 15°-55° N, 70°-135° E.

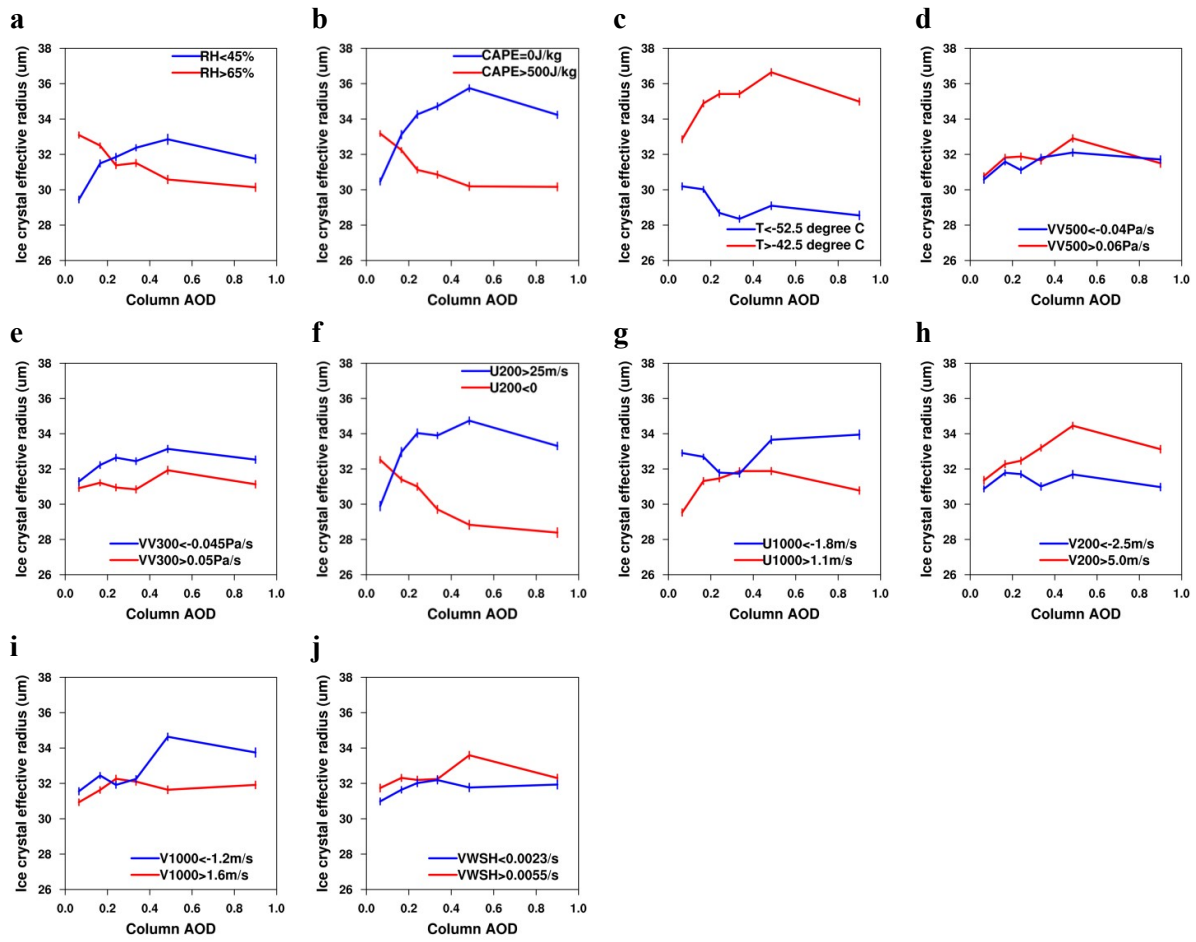

1 Figure S2. Changes in  $R_{ci}$  as a function of AOD for different ranges of (a) relative humidity  
 2 averaged between 100 hPa and 440 hPa ( $RH_{100-440\text{hPa}}$ ), (b) the convective available potential  
 3 energy (CAPE), (c) the middle cloud layer temperature ( $T_{mid}$ ), (d) the pressure vertical  
 4 velocity at 500 hPa (VV500), (e) the pressure vertical velocity at 300 hPa (VV300), (f) the U-  
 5 components of wind speed at 200 hPa (U200), (g) the U-components of wind speed at 1000  
 6 hPa (U1000), (h) the V-components of wind speed at 200 hPa (V200), (i) the V-components  
 7 of wind speed at 1000 hPa (V1000), (j) and the vertical wind shear (VWSH) at potential  
 8 vorticity surface of  $2 \times 10^{-6} \text{ deg K m}^2 \text{ kg}^{-1} \text{ s}^{-1}$ . The meteorological parameters are divided into  
 9 3 ranges containing similar numbers of data points, and the curves for the medium  
 10 meteorological range are not shown. The definition of error bars is the same as in Fig. 1 in the  
 11 main text. The total number of samples used in this figure is  $5.68 \times 10^4$ .

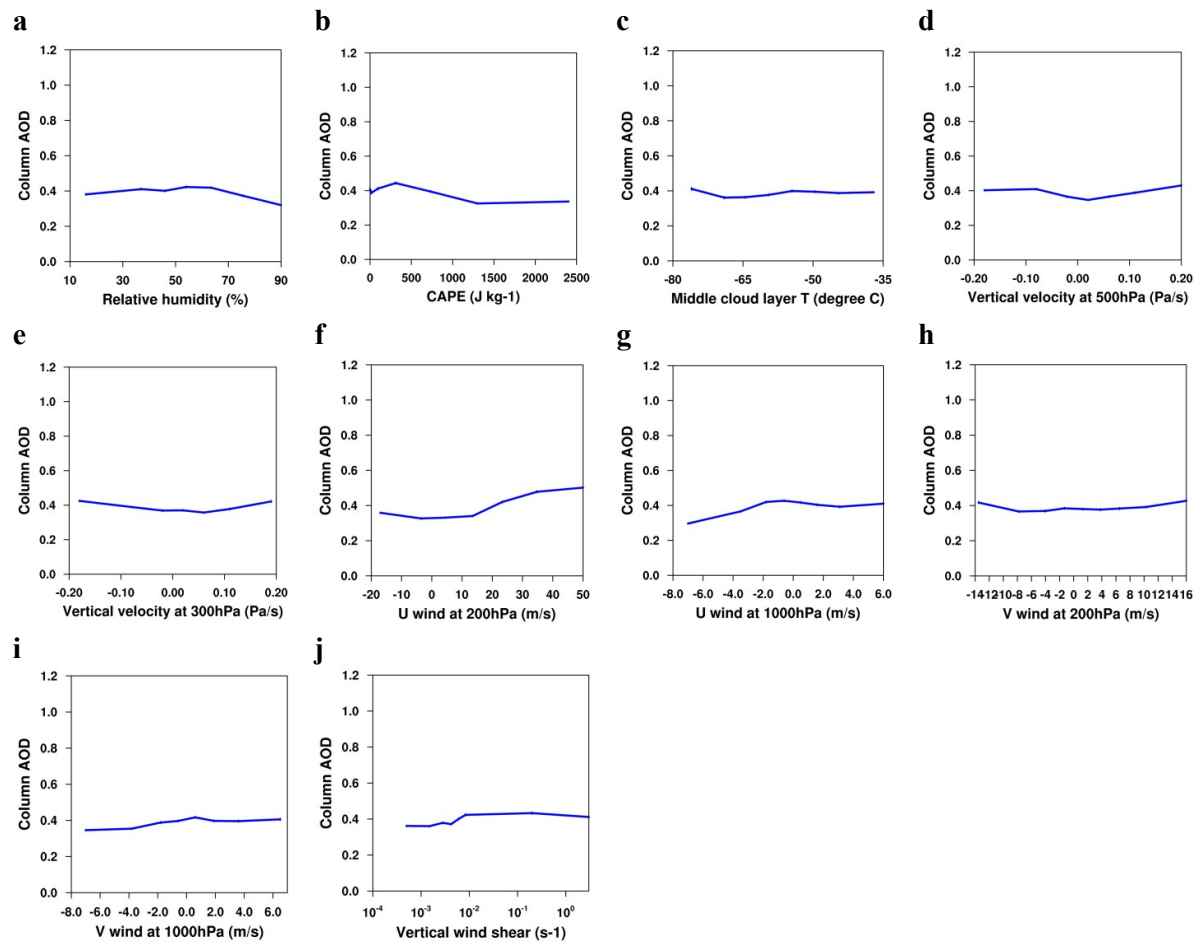

1 Figure S3. Changes in AOD as a function of meteorological parameters: (a)  $RH_{100-440hPa}$ , (b)  
 2 CAPE, (c)  $T_{mid}$ , (d) VV500, (e) VV300, (f) U200, (g) U1000, (h) V200, (i) V1000, and (j)  
 3 VWSH at the potential vorticity surface of  $2 \times 10^{-6} \text{ deg K m}^2 \text{ kg}^{-1} \text{ s}^{-1}$ . The definition of error  
 4 bars is the same as in Fig. 1 in the main text. Note that the error bars in some panels are very  
 5 small and hence not visible. The total number of samples used in this figure is  $5.68 \times 10^4$ .

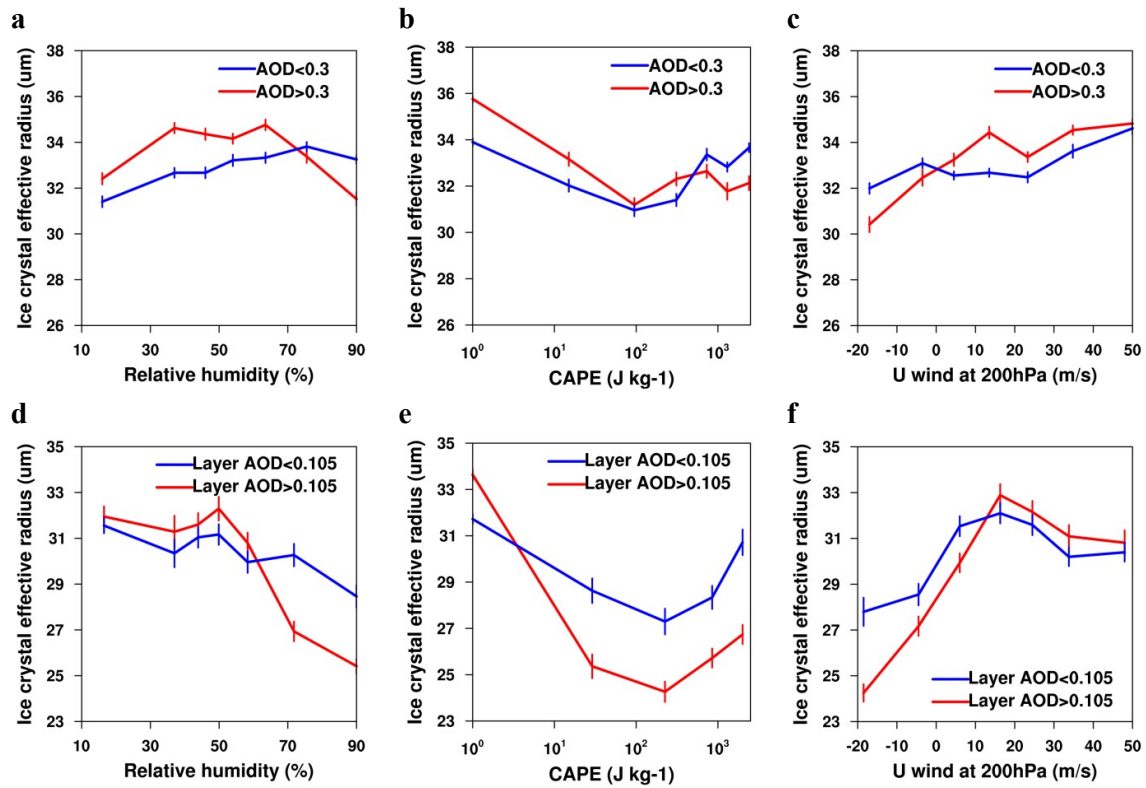

1 Figure S4. Changes in  $R_{ci}$  with meteorological parameters for different ranges of aerosol  
 2 loading. (a-c) Changes in  $R_{ci}$  of convection-generated ice clouds with (a)  $RH_{100-440hPa}$ , (b)  
 3 CAPE, and (c) U200 for different ranges of AOD. (d-f) Changes in  $R_{ci}$  of in-situ ice clouds  
 4 with (d)  $RH_{100-440hPa}$ , (e) CAPE, and (f) U200 for different ranges of layer AOD. All samples  
 5 are divided into two AOD ranges containing similar sample numbers. The definition of error  
 6 bars is the same as in Fig. 1. The total numbers of samples used for convection-generated and  
 7 in-situ ice clouds are  $2.73 \times 10^4$  and  $1.09 \times 10^4$ , respectively.

1 Table S1. Datasets used in this study.

| Satellite/<br>Sensor | Product                                | Variable                                                                                                                                                                                                   | Horizontal<br>resolution |
|----------------------|----------------------------------------|------------------------------------------------------------------------------------------------------------------------------------------------------------------------------------------------------------|--------------------------|
| Aqua/MODIS           | MYD04 (Level<br>2, Collection 6)       | Column AOD                                                                                                                                                                                                 | 10 km × 10<br>km         |
|                      | MYD06 (Level<br>2, Collection 6)       | Cloud effective radius, cloud phase (determined by<br>the “cloud optical property” algorithm), primary<br>cloud retrieval outcome, Cloud effective radius<br>uncertainty                                   | 1 km × 1 km              |
| CALIPSO/<br>CALIOP   | 05kmMLay<br>(Level 2,<br>Version 4.10) | Aerosol/cloud layer number, layer base<br>temperature, middle layer temperature, layer<br>top/base height, layer aerosol/cloud optical depth,<br>feature classification flags, CAD score, extinction<br>QC | 5 km along-<br>track     |
|                      | 05kmAPro<br>(Level 2,<br>Version 4.10) | Vertically resolved pressure, relative humidity, and<br>temperature                                                                                                                                        | 5 km along-<br>track     |
| --                   | NCEP ds083.2                           | Vertically resolved pressure vertical velocity and<br>wind speed; CAPE, wind shear                                                                                                                         | 1° × 1°                  |

2

3 Table S2. Correlation coefficients between various meteorological parameters.

|                          | RH <sub>100-440hPa</sub> | CAPE   | U200   | T <sub>mid</sub> |
|--------------------------|--------------------------|--------|--------|------------------|
| RH <sub>100-440hPa</sub> | --                       | 0.514  | -0.535 | -0.352           |
| CAPE                     | 0.514                    | --     | -0.623 | -0.390           |
| U200                     | -0.535                   | -0.623 | --     | 0.502            |
| T <sub>mid</sub>         | -0.352                   | -0.390 | 0.502  | --               |

4 Note:  $p < 0.01$  for all cases. RH<sub>100-440hPa</sub>, relative humidity averaged between 100 hPa and 440 hPa; CAPE,  
5 convective available potential energy; U200, U-components of wind speed at 200 hPa; T<sub>mid</sub>, middle cloud  
6 layer temperature.

7
